# Supplementary material for: YTHDF2 correlates with tumor immune infiltrates in lower-grade glioma
Source: PubMed Central journal article supplement (PMC7585119; doi:10.18632/aging.103812), 2020-09-27
Supplement: aging-12-103812-s001..pdf [file aging-12-103812-s001..pdf]

**Supplementary Table 1. The significant Datasets of the YTHDF2 in Human Cancers (ONCOMINE database).**

| <b>Cancer type</b>          | <b>Sub cancer type</b>                 | <b>t-Test</b> | <b>Fold Change</b> | <b>P-value</b> | <b>Study</b>                    |
|-----------------------------|----------------------------------------|---------------|--------------------|----------------|---------------------------------|
| <b>Brain and CNS Cancer</b> | Anaplastic Oligoastrocytoma vs. Normal | 5.874         | 2.433              | 1.90E-04       | French Brain Statistics         |
|                             | Glioblastoma vs. Normal                | -16.491       | -2.762             | 3.97E-13       | Lee Brain Statistics            |
| <b>Breast cancer</b>        | Fibroadenoma vs. Normal                | 5.597         | 9.945              | 0.003          | Sorlie Breast Statistics        |
|                             | Fibroadenoma vs. Normal                | 6.235         | 11.69              | 0.002          | Sorlie Breast 2 Statistics      |
| <b>Cervical Cancer</b>      | Cervical Cancer vs. Normal             | 6.66          | 2.061              | 3.58E-08       | Pyeon Multi-cancer Statistics   |
| <b>Head and Neck cancer</b> | Oral Cavity Carcinoma vs. Normal       | 5.523         | 2.838              | 1.78E-04       | Pyeon Multi-cancer Statistics   |
| <b>Kidney cancer</b>        | Renal Wilms Tumor vs. Normal           | 4.817         | 2.3                | 0.002          | Yusenko Renal Statistics        |
| <b>Other cancer</b>         | Parathyroid Hyperplasia vs. Normal     | 4.171         | 2.55               | 8.54E-04       | Morrison Parathyroid Statistics |
|                             | Parathyroid Gland Adenoma vs. Normal   | 5.064         | 2.038              | 3.88E-04       | Morrison Parathyroid Statistics |
